# Supplementary material
Source: ML conference proceedings conference paper supplement (https://openreview.net/forum?id=cjnSJIf3c9Y)
Supplement: supplementary_material [file attachment]

---

# Supplementary Material to 'Locally differentially private estimation of nonlinear functionals of discrete distributions'

---

**Cristina Butucea**  
 CREST, ENSAE, IP Paris  
 Palaiseau 91120 Cedex, France  
 cristina.butucea@ensae.fr

**Yann Issartel**  
 CREST, ENSAE, IP Paris  
 Palaiseau 91120 Cedex, France  
 yann.issartel@ensae.fr

This Supplementary Material contains the proofs of the results in [1] and is consistent in notation with the main paper.

## A Proofs of upper bounds

### A.1 Plug-in estimator

**Proof of 1<sup>st</sup> bound in Theorem 2.1.** 1°. *Bias:* We have using the triangle inequality,

$$\left| \mathbb{E} \hat{F}_\gamma - F_\gamma \right| = \left| \mathbb{E} \hat{F}_\gamma - \sum_{k=1}^K p_k^\gamma \right| \leq \sum_{k=1}^K \left| \mathbb{E} \hat{F}_\gamma(k) - p_k^\gamma \right| .$$

Hence, it suffices to upper bound the  $k^{\text{th}}$  bias component  $|\mathbb{E} \hat{F}_\gamma(k) - p_k^\gamma|$  for all  $k \in [K]$  and  $\gamma \neq 1$  (the case  $\gamma = 1$  being trivial). We separate the analysis in two different ranges of values of  $p_k$ . Define  $\mathcal{K}_{\geq \tau} = \{k \in [K] : p_k \geq \tau\}$ , and  $\mathcal{K}_{< \tau} = [K] \setminus \mathcal{K}_{\geq \tau}$ . By Lemma B.5 we have

$$\sum_{k \in \mathcal{K}_{< \tau}} \left| \mathbb{E} \hat{F}_\gamma(k) - p_k^\gamma \right| \leq C \frac{|\mathcal{K}_{< \tau}|}{(\alpha^2 n)^{\gamma/2}}$$

for a constant  $C$  depending only on  $\gamma$ . Lemma B.7 ensures that

$$\sum_{k \in \mathcal{K}_{\geq \tau}} \left| \mathbb{E} \hat{F}_\gamma(k) - p_k^\gamma \right| \leq C' \left( \frac{|\mathcal{K}_{\geq \tau}|}{(\alpha^2 n)^{\gamma/2}} + \mathbb{1}_{\{\gamma \geq 2\}} \frac{\|p^{\geq \tau}\|_{\gamma-2}^{\gamma-2}}{\alpha^2 n} \right)$$

for a constant  $C'$  depending only on  $\gamma$ . Gathering the above inequalities, we have

$$\left| \mathbb{E} \hat{F}_\gamma - F_\gamma \right| \leq (C + C') \left( \frac{K}{(\alpha^2 n)^{\gamma/2}} + \mathbb{1}_{\{\gamma \geq 2\}} \frac{\|p^{\geq \tau}\|_{\gamma-2}^{\gamma-2}}{\alpha^2 n} \right). \quad (14)$$

2°. *Variance:* By Lemma B.4, we have  $\text{Cov}(\hat{F}_\gamma(k), \hat{F}_\gamma(k')) \leq 0$  for any  $k \neq k' \in [K]$ . Hence

$$\text{Var} \left( \sum_{k=1}^K \hat{F}_\gamma(k) \right) \leq \sum_{k=1}^K \text{Var} \left( \hat{F}_\gamma(k) \right) . \quad (15)$$

As in the proof of the bias bound above, we separate our analysis in two different ranges of values of  $p_k$ . For small  $p_k$ , we use Lemma B.5 to get

$$\sum_{k \in \mathcal{K}_{< \tau}} \text{Var} \left( \hat{F}_\gamma(k) \right) \leq \tilde{C} \frac{|\mathcal{K}_{< \tau}|}{(\alpha^2 n)^\gamma} ,$$

where  $\tilde{C}$  is a constant depending only on  $\gamma$ . For large  $p_k$ , we deduce from Lemma B.8 that

$$\sum_{k \in \mathcal{K}_{\geq \tau}} \text{Var} \left( \hat{F}_\gamma(k) \right) \leq \tilde{C}' \left( \frac{|\mathcal{K}_{\geq \tau}|}{(\alpha^2 n)^\gamma} + \mathbb{1}_{\{\gamma \geq 1\}} \frac{\|p^{\geq \tau}\|_{2\gamma-2}^{2\gamma-2}}{\alpha^2 n} \right)$$

for a constant  $\tilde{C}'$  depending only on  $\gamma$ . Then, plugging these bounds into (15), we have

$$\text{Var} \left( \sum_{k=1}^K \hat{F}_\gamma(k) \right) \leq (\tilde{C} + \tilde{C}') \left( \frac{K}{(\alpha^2 n)^\gamma} + \mathbb{1}_{\{\gamma \geq 1\}} \frac{\|p^{\geq \tau}\|_{2\gamma-2}^{2\gamma-2}}{\alpha^2 n} \right). \quad (16)$$

The proof of the of 1<sup>st</sup> bound in Theorem 2.1 is complete.  $\square$

**Proof of 2<sup>nd</sup> bound in Theorem 2.1.** We only need to control the second and third terms of the 1<sup>st</sup> bound in Theorem 2.1. The squared root of the second term is bounded from above by

$$\frac{\sum_{k=1}^K p_k^{\gamma-2} \mathbb{1}_{\{p_k > \tau\}}}{\alpha^2 n} \leq \sum_{k=1}^K \frac{p_k^{\gamma-1}}{\sqrt{\alpha^2 n}} \frac{p_k^{-1} \mathbb{1}_{\{p_k > \tau\}}}{\sqrt{\alpha^2 n}} \leq \sum_{k=1}^K \frac{p_k^{\gamma-1} c^{-1}}{\sqrt{\alpha^2 n}} = \frac{\|p\|_{\gamma-1}^{\gamma-1} c^{-1}}{\sqrt{\alpha^2 n}}.$$

Since  $(p_k)_k$  are probabilities, we have  $p_k^{\gamma-1} \leq p_k$  for  $\gamma \geq 2$  and we can further bound the last display by  $\|p\|_{\gamma-1}^{\gamma-1} \leq \sum_{k=1}^K p_k = 1$  for  $\gamma \geq 2$ . Hence, the second term is bounded by  $\mathbb{1}_{\{\gamma \geq 2\}} (\alpha^2 n)^{-1}$ .

Let us bound the third term. Since  $\sum_k p_k = 1$ , the number of the significant  $p_k \geq \tau$  is necessarily smaller than  $\tau^{-1} = c^{-1} \sqrt{\alpha^2 n}$ , and thus smaller than  $K_{\wedge \tau^{-1}} := K \wedge \sqrt{\alpha^2 n}$ . Then, when  $\gamma \in (1, 3/2)$ , we use the concavity to have  $\|p^{\geq \tau}\|_{2\gamma-2}^{2\gamma-2} \leq K_{\wedge \tau^{-1}}^{3-2\gamma}$  for all  $p \in \mathcal{P}_K$ . When  $\gamma \geq 3/2$  we have  $\|p^{\geq \tau}\|_{2\gamma-2}^{2\gamma-2} \leq 1$ . Therefore, the third term is uniformly bounded over the class  $\mathcal{P}_K$  by

$$\mathbb{1}_{\{\gamma \geq 1\}} \frac{\|p^{\geq \tau}\|_{2\gamma-2}^{2\gamma-2}}{\alpha^2 n} \leq \mathbb{1}_{\{\gamma \geq 1\}} \frac{1 \vee K_{\wedge \tau^{-1}}^{3-2\gamma}}{\alpha^2 n}.$$

This concludes the proof of the 2<sup>nd</sup> bound in Theorem 2.1.  $\square$

## A.2 Thresholded plug-in estimator (proof of Theorem 2.3)

Case  $\gamma \in (0, 1)$ : Let us check the first bound of Theorem 2.3. We use the concavity of the power function  $p^\gamma$  to have  $F_\gamma \leq K (\sum_{k=1}^K p_k / K)^\gamma = K^{1-\gamma}$ . Then, the quadratic risk of the trivial estimator 0 is bounded by  $K^{2(1-\gamma)}$ . On the other hand, the quadratic risk of the plug-in  $\hat{F}_\gamma$  is bounded by  $K^2 / (\alpha^2 n)^\gamma$  (Theorem 2.1). Therefore, the quadratic risk of the thresholded estimator  $\bar{F}_\gamma := \mathbb{1}_{K \leq \tau^{-1}} \hat{F}_\gamma$  satisfies the first bound of Theorem 2.3.

Case  $\gamma > 1$ : Recall that  $\hat{\tau} \asymp \sqrt{\log(Kn) / (\alpha^2 n)}$ . We will prove the next bound on the risk of  $\bar{F}_\gamma$ ,

$$\mathbb{E} [(\bar{F}_\gamma - F_\gamma)^2] \lesssim_\gamma (K \hat{\tau}^\gamma \wedge \hat{\tau}^{\gamma-1})^2 + \frac{(K \wedge \hat{\tau}^{-1})^{3-2\gamma} \vee 1}{\alpha^2 n}. \quad (17)$$

Before that, we check that (17) implies the second inequality of Theorem 2.3.

(i) Assume that  $K \geq \hat{\tau}^{-1}$ , then the RHS of (17) becomes

$$\hat{\tau}^{2(\gamma-1)} + \frac{\hat{\tau}^{2\gamma-3} \vee 1}{\alpha^2 n} \lesssim \frac{(\log(Kn))^{\gamma-1}}{(\alpha^2 n)^{\gamma-1}} + \frac{(\log(Kn))^{\gamma-(3/2)}}{(\alpha^2 n)^{\gamma-(1/2)}} + \frac{1}{\alpha^2 n} \lesssim \frac{(\log(Kn))^{\gamma-1}}{(\alpha^2 n)^{\gamma-1}} + \frac{1}{\alpha^2 n},$$

where the last inequality follows from the bound

$$\frac{(\log(Kn))^{\gamma-(3/2)}}{(\alpha^2 n)^{\gamma-(1/2)}} \leq \frac{(\log(Kn))^{\gamma-1}}{(\alpha^2 n)^{\gamma-1}},$$

which is equivalent to  $\alpha^2 n \log(Kn) \geq 1$ . Hence, (17) is upper bounded by the smallest term of the second inequality of Theorem 2.3.

(ii) Assume that  $K \leq \hat{\tau}^{-1}$ , then the RHS of (17) becomes

$$K^2 \hat{\tau}^{2\gamma} + \frac{K^{3-2\gamma} \vee 1}{\alpha^2 n} \lesssim \frac{K^2 (\log(Kn))^\gamma}{(\alpha^2 n)^\gamma} + \frac{1 \vee K^{3-2\gamma}}{\alpha^2 n},$$

which is the smallest term of the second inequality of Theorem 2.3. Hence, we have proved that the second inequality of Theorem 2.3 follows from (17).

**Proof of (17).** We have the deterministic bound

$$|\overline{F}_\gamma - F_\gamma| \leq \overline{F}_\gamma + F_\gamma \leq K(2^\gamma + 1).$$

Introduce the following event

$$A = \left\{ \exists k \in [K] : \left( \hat{z}_k^{(1)} < \hat{\tau} \text{ and } p_k \geq 3\hat{\tau}/2 \right) \text{ or } \left( \hat{z}_k^{(1)} \geq \hat{\tau} \text{ and } p_k < \hat{\tau}/2 \right) \right\}$$

and denote the complementary event by  $A^c$ . We have

$$\mathbb{E} [(\overline{F}_\gamma - F_\gamma)^2] \leq \mathbb{E} [\mathbb{1}_{A^c} (\overline{F}_\gamma - F_\gamma)^2] + \mathbb{P}(A) (K(2^\gamma + 1))^2. \quad (18)$$

Let us bound the second term of the RHS of (18) by showing that  $\mathbb{P}(A) \leq 6/(K^2 n)$ . By assumption in the theorem, we have  $n \geq 2 \log(K)$ . This ensures that  $n \geq \log(Kn^{1/3})$ , which allows us to use Lemma B.3 which gives  $\mathbb{P} \left( |\hat{z}_k^{(1)} - p_k| > \hat{\tau}/2 \right) \leq 6/(K^3 n)$ . Hence, for  $p_k \geq 3\hat{\tau}/2$ , we have

$$\mathbb{P} \left( \hat{z}_k^{(1)} < \hat{\tau} \right) \leq \frac{6}{K^3 n},$$

and for  $p_k < \hat{\tau}/2$ ,

$$\mathbb{P} \left( \hat{z}_k^{(1)} \geq \hat{\tau} \right) \leq \frac{6}{K^3 n}.$$

We then use the union bound over  $k \in [K]$  to get  $\mathbb{P}(A) \leq 6/(K^2 n)$ . The second term of the RHS of (18) is therefore bounded by  $6(2^\gamma + 1)^2/n$ .

We now control the first term of the RHS of (18). For any real  $a > 0$ , we note  $\mathcal{K}_{<a} = \{k \in [K] : p_k < a\}$  and  $\hat{\mathcal{K}}_{<a} = \{k \in [K] : \hat{z}_k^{(1)} < a\}$ , with their respective complementary sets  $\mathcal{K}_{\geq a} = [K] \setminus \mathcal{K}_{<a}$  and  $\hat{\mathcal{K}}_{\geq a} = [K] \setminus \hat{\mathcal{K}}_{<a}$ . Splitting the sum over the  $k$  in  $\hat{\mathcal{K}}_{<\hat{\tau}}$  and  $\hat{\mathcal{K}}_{\geq \hat{\tau}}$  respectively, we get

$$\mathbb{1}_{A^c} (\overline{F}_\gamma - F_\gamma)^2 \leq 2 \mathbb{1}_{A^c} \left( \|(p_k)_{k \in \hat{\mathcal{K}}_{<\hat{\tau}}}\|_\gamma^\gamma \right)^2 + 2 \mathbb{1}_{A^c} \left( \sum_{k \in \hat{\mathcal{K}}_{\geq \hat{\tau}}} \overline{F}_\gamma(k) - F_\gamma(k) \right)^2.$$

Since  $\hat{\mathcal{K}}_{<\hat{\tau}} \subset \mathcal{K}_{<3\hat{\tau}/2}$  on the event  $A^c$ , we can bound the first term by

$$\mathbb{1}_{A^c} \|(p_k)_{k \in \hat{\mathcal{K}}_{<\hat{\tau}}}\|_\gamma^\gamma \leq \|(p_k)_{k \in \mathcal{K}_{<3\hat{\tau}/2}}\|_\gamma^\gamma \leq K(3\hat{\tau}/2)^\gamma \wedge (3\hat{\tau}/2)^{\gamma-1}$$

for any  $\gamma > 1$  and  $p \in \mathcal{P}_K$ . For the second term, we will use the independence between the data samples  $z^{(1)} := (z_1^{(1)}, \dots, z_n^{(1)})$  and  $z^{(2)} := (z_1^{(2)}, \dots, z_n^{(2)})$ . In particular, the set  $\hat{\mathcal{K}}_{\geq \hat{\tau}}$  and the event  $A^c$  are deterministic conditionally to  $z^{(1)}$ , so that

$$\begin{aligned} \mathbb{E} \left[ \mathbb{1}_{A^c} \left( \sum_{k \in \hat{\mathcal{K}}_{\geq \hat{\tau}}} \overline{F}_\gamma(k) - F_\gamma(k) \right)^2 \middle| z^{(1)} \right] &= \mathbb{1}_{A^c} \mathbb{E} \left[ \left( \sum_{k \in \hat{\mathcal{K}}_{\geq \hat{\tau}}} \overline{F}_\gamma(k) - F_\gamma(k) \right)^2 \middle| z^{(1)} \right] \\ &\leq \mathbb{1}_{A^c} C \left( \frac{|\hat{\mathcal{K}}_{\geq \hat{\tau}}|^2}{(\alpha^2 n)^\gamma} + \frac{|\hat{\mathcal{K}}_{\geq \hat{\tau}}|^{3-2\gamma} \vee 1}{\alpha^2 n} \right) \end{aligned}$$

where the last line is similar to the 2<sup>nd</sup> bound in Theorem 2.1 with  $K$  replaced by  $|\hat{\mathcal{K}}_{\geq \hat{\tau}}|$ , and where  $C$  is some constant depending only on  $\gamma$ . We can further bound the last display by noting that  $\hat{\mathcal{K}}_{\geq \hat{\tau}} \subset \mathcal{K}_{\geq \hat{\tau}/2}$  on the event  $A^c$ , and  $|\mathcal{K}_{\geq \hat{\tau}/2}| \leq K \wedge (\hat{\tau}/2)^{-1}$ . Going back to (18), we then have for all  $p \in \mathcal{P}_K$ ,

$$\begin{aligned} \mathbb{E} [(\overline{F}_\gamma - F_\gamma)^2] &\lesssim_\gamma (K\hat{\tau}^\gamma \wedge \hat{\tau}^{\gamma-1})^2 + \frac{(K \wedge \hat{\tau}^{-1})^2}{(\alpha^2 n)^\gamma} + \frac{(K \wedge \hat{\tau}^{-1})^{3-2\gamma} \vee 1}{\alpha^2 n} + \frac{1}{n} \\ &\lesssim_\gamma (K\hat{\tau}^\gamma \wedge \hat{\tau}^{\gamma-1})^2 + \frac{(K \wedge \hat{\tau}^{-1})^{3-2\gamma} \vee 1}{\alpha^2 n}. \end{aligned}$$

The proof of (17) is complete.  $\square$

### A.3 Interactive privacy mechanism

**Proof of 1<sup>st</sup> bound in Theorem 2.4.** 1°. *Bias*: We decompose the expected value of  $\tilde{F}_\gamma$  :

$$\begin{aligned}\mathbb{E} \tilde{F}_\gamma &= \frac{1}{n} \sum_{i=1}^n \mathbb{E} \mathbb{E} \left[ z_i^{(2)} | z^{(1)}, z^{(2)} \right] = \frac{1}{n} \sum_{i=1}^n \mathbb{E} \mathbb{E} \left[ \hat{F}_{\gamma-1}^{(1)}(x_i^{(2)}) | z^{(1)}, x^{(2)} \right] \\ &= \sum_{k=1}^K p_k \mathbb{E} \mathbb{E} \left[ \hat{F}_{\gamma-1}^{(1)}(k) | z^{(1)} \right] = \sum_{k=1}^K p_k \mathbb{E} \left[ \hat{F}_{\gamma-1}^{(1)}(k) \right]\end{aligned}\quad (19)$$

so that, for any  $\gamma > 1$ ,  $\gamma \neq 2$  (the case  $\gamma = 2$  being trivial), we have

$$\begin{aligned}\left| \mathbb{E} \tilde{F}_\gamma - \sum_{k=1}^K p_k^\gamma \right| &\leq \sum_{k=1}^K p_k \left| \mathbb{E} \hat{F}_{\gamma-1}^{(1)}(k) - p_k^{\gamma-1} \right| \\ &\leq C \left( \frac{1}{(\alpha^2 n)^{(\gamma-1)/2}} + \mathbb{1}_{\{\gamma \geq 3\}} \frac{\|p^{\geq \tau}\|_{\gamma-2}^{\gamma-2}}{\alpha^2 n} \right)\end{aligned}\quad (20)$$

using Lemma B.5 and B.7 and  $\sum_k p_k = 1$ , where  $C$  is a constant depending only on  $\gamma$ .

2°. *Variance*: By the law of total variance we have

$$\text{Var} \left( \tilde{F}_\gamma \right) = \mathbb{E} \left[ \text{Var} \left( \tilde{F}_\gamma | z^{(1)} \right) \right] + \text{Var} \left( \mathbb{E} \left[ \tilde{F}_\gamma | z^{(1)} \right] \right) . \quad (21)$$

We control the first term in the RHS of (21):

$$\begin{aligned}\text{Var} \left( \tilde{F}_\gamma | z^{(1)} \right) &= \frac{1}{n} \text{Var} \left( z_1^{(2)} | z^{(1)} \right) \leq \frac{1}{n} \mathbb{E} \left[ \left( z_1^{(2)} \right)^2 | z^{(1)} \right] \\ &= \frac{2^{2\gamma-1}}{n} \left( \frac{e^\alpha + 1}{e^\alpha - 1} \right)^2 \leq \frac{2^{2\gamma+1}}{\alpha^2 n}\end{aligned}$$

where we used  $\left( \frac{e^\alpha + 1}{e^\alpha - 1} \right)^2 = \left( 1 + \frac{1}{e^\alpha - 1} \right)^2 \leq \left( 1 + \frac{1}{\alpha} \right)^2 \leq \frac{4}{\alpha^2}$ . For the second term in the RHS of (21), we have using (19)

$$\text{Var} \left( \mathbb{E} \left[ \tilde{F}_\gamma | Z^{(1)} \right] \right) = \text{Var} \left( \sum_{k=1}^K p_k \hat{F}_{\gamma-1}^{(1)}(k) \right) \leq \sum_{k=1}^K p_k^2 \text{Var} \left( \hat{F}_{\gamma-1}^{(1)}(k) \right)$$

where the inequality can be deduced from Lemma B.4. Then, by Lemma B.5 and B.8,

$$\sum_{k=1}^K p_k^2 \text{Var} \left( \hat{F}_{\gamma-1}^{(1)}(k) \right) \leq \tilde{C} \left( \frac{\|p\|_2^2}{(\alpha^2 n)^{\gamma-1}} + \mathbb{1}_{\{\gamma \geq 2\}} \frac{\|p^{\geq \tau}\|_{2\gamma-2}^{2\gamma-2}}{\alpha^2 n} \right)$$

for a constant  $\tilde{C}$  depending only  $\gamma$ . The proof of the 1<sup>st</sup> bound in Theorem 2.4 is complete.  $\square$

**Proof of 2<sup>nd</sup> bound in Theorem 2.4.** The desired bound follows from the 1<sup>st</sup> bound of Theorem 2.4 and the fact that  $\mathbb{1}_{\{\gamma \geq 3\}} \|p^{\geq \tau}\|_{\gamma-2}^{\gamma-2} \leq 1$  and  $\mathbb{1}_{\{\gamma \geq 2\}} \|p^{\geq \tau}\|_{2\gamma-2}^{2\gamma-2} \leq \|p\|_2^2 \leq 1$  for all  $p \in \mathcal{P}_K$ .  $\square$

## B Main lemmas for upper bounds

We use the notations  $\hat{x}_k = \frac{1}{n} \sum_{i=1}^n \mathbb{1}_{\{x_i=k\}}$  and  $\hat{w}_k = \frac{1}{n} \sum_{i=1}^n w_{ik}$ , so that  $\hat{z}_k = \hat{x}_k + \frac{\sigma}{\alpha} \hat{w}_k$ . We consider  $\alpha \in (0, \infty)$  in this Appendix B, unlike in the main section of the paper where we assumed that  $\alpha \in (0, 1)$  and  $\alpha^2 n \geq 1$ .

### B.1 Concentration of $\hat{z}_k$

We control the concentration of  $\hat{z}_k$  in the next lemma.

**Lemma B.1.** For any  $\alpha \in (0, \infty)$  and any  $r > 0$ , we have

$$\begin{aligned}\mathbb{E} [|\hat{z}_k - p_k|^r] &\leq \frac{C_{BL,r}}{((\alpha^2 \wedge 1)n)^{r/2}}, \\ \mathbb{E} [|\hat{z}_k|^r] &\leq \frac{2^r C_{BL,r}}{((\alpha^2 \wedge 1)n)^{r/2}} + 2^r p_k^r,\end{aligned}$$

where  $C_{BL,r}$  is a constant depending only on  $r$ . Besides,

$$\mathbb{P}(\hat{z}_k < \frac{p_k}{2}) \leq 3 \exp \left[ -\frac{n}{128} \left( \frac{(\alpha \wedge 1)p_k}{\sigma} \right)^2 \right].$$

**Proof of Lemma B.1.** By (35) in Lemma C.1 and (37) in Lemma C.2, we have for any  $r > 0$ ,

$$\begin{aligned}\mathbb{E} [|\hat{z}_k - p_k|^r] &\leq 2^r \mathbb{E} [|\hat{x}_k - p_k|^r] + 2^r \mathbb{E} \left[ \left( \frac{|\sigma \hat{w}_k|}{\alpha} \right)^r \right] \leq \frac{2^r C_{B,r}}{n^{r/2}} + \frac{(2\sigma)^r C_{L,r}}{(\alpha^2 n)^{r/2}} \\ &\leq \frac{2^r (C_{B,r} + \sigma^r C_{L,r})}{((\alpha^2 \wedge 1)n)^{r/2}}\end{aligned}$$

where  $C_{B,r}$  and  $C_{L,r}$  are constants that only depend on  $r$ . Then, denoting  $C_{BL,r} = 2^r (C_{B,r} + \sigma^r C_{L,r})$ , we have

$$\begin{aligned}\mathbb{E} [|\hat{z}_k|^r] &= \mathbb{E} [|\hat{z}_k - p_k + p_k|^r] \leq 2^r \mathbb{E} [|\hat{z}_k - p_k|^r] + 2^r p_k^r \\ &\leq \frac{2^r C_{BL,r}}{((\alpha^2 \wedge 1)n)^{r/2}} + 2^r p_k^r.\end{aligned}$$

Finally, by (32) in Lemma C.1 and (36) in Lemma C.2, we have

$$\begin{aligned}\mathbb{P}(\hat{z}_k < \frac{p_k}{2}) &\leq \mathbb{P}(\hat{x}_k < \frac{3p_k}{4}) + \mathbb{P}(\frac{\sigma \hat{w}_k}{\alpha} < -\frac{p_k}{4}) \leq e^{-(\frac{1}{4})^2 \frac{np_k}{2}} + e^{-\frac{n}{8} (\frac{\alpha p_k}{4\sigma})^2} + e^{-\frac{n}{4} (\frac{\alpha p_k}{4\sigma})^2} \\ &\leq 3e^{-\frac{n}{128\sigma^2} ((\alpha \wedge 1)p_k)^2}.\end{aligned}$$

The proof of Lemma B.1 is complete.  $\square$

Recall that  $\hat{F}_\gamma(k) = (T_{[0,2]}[\hat{z}_k])^\gamma$ . We bound the difference between the expectations of  $T_{[0,2]}[\hat{z}_k]$  and  $\hat{z}_k$  in the next lemma.

**Lemma B.2.** We have for any  $\alpha \in (0, \infty)$ ,

$$|\mathbb{E} [T_{[0,2]}[\hat{z}_k]] - p_k| \leq \frac{2p_k^{-1}}{(\alpha^2 \wedge 1)n} \left( \sigma^2 C_{L,2} + \frac{16\gamma}{e} \right).$$

**Proof of Lemma B.2.** Recall that  $\hat{z}_k = \hat{x}_k + \frac{\sigma}{\alpha} \hat{w}_k$ , and define  $\epsilon_k$  by  $T_{[0,2]}[\hat{z}_k] = \hat{x}_k + \epsilon_k$ . Then  $\mathbb{E} [T_{[0,2]}[\hat{z}_k]] - p_k = \mathbb{E} [\epsilon_k]$  and it suffices to bound  $|\mathbb{E} [\epsilon_k]|$ . Introducing the event  $A = \{|\frac{\sigma}{\alpha} \hat{w}_k| < \hat{x}_k\}$  and the complementary event  $A^c$ , we note first that  $A \subseteq \{\hat{z}_k \in [0, 2]\}$  and thus  $\epsilon_k = \frac{\sigma}{\alpha} \hat{w}_k$  on  $A$ . We have

$$\begin{aligned}|\mathbb{E} [\epsilon_k]| &\leq |\mathbb{E} [\epsilon_k \mathbb{1}_A]| + |\mathbb{E} [\epsilon_k \mathbb{1}_{A^c}]| = |\mathbb{E} \left[ \frac{\sigma}{\alpha} \hat{w}_k \mathbb{1}_A \right]| + |\mathbb{E} [\epsilon_k \mathbb{1}_{A^c}]| \\ &= |\mathbb{E} \mathbb{E} \left[ \frac{\sigma}{\alpha} \hat{w}_k \mathbb{1}_A \middle| \hat{x}_k \right]| + |\mathbb{E} [\epsilon_k \mathbb{1}_{A^c}]| \\ &= |\mathbb{E} [\epsilon_k \mathbb{1}_{A^c}]|\end{aligned}$$

since  $\hat{w}_k$  is a centered and symmetric random variable that is independent of  $\hat{x}_k$ . Using the event  $B = \{2p_k \geq \hat{x}_k \geq p_k/2\}$  and the complementary event  $B^c$ , we have

$$\begin{aligned}|\mathbb{E} [\epsilon_k \mathbb{1}_{A^c}]| &\leq \mathbb{E} [|\epsilon_k| \mathbb{1}_{A^c \cap B}] + \mathbb{E} [|\epsilon_k| \mathbb{1}_{A^c \cap B^c}] \leq \mathbb{E} \left[ |\epsilon_k| \mathbb{1}_{\{|\frac{\sigma}{\alpha} \hat{w}_k| \geq \frac{1}{2} p_k\}} \right] + 2 \mathbb{E} [\mathbb{1}_{B^c}] \\ &\leq \mathbb{E} \left[ \frac{\sigma}{\alpha} |\hat{w}_k| \mathbb{1}_{\{|\frac{\sigma}{\alpha} \hat{w}_k| \geq \frac{1}{2} p_k\}} \right] + 4e^{-\frac{1}{8} np_k} \\ &= 2p_k^{-1} \left( \mathbb{E} \left[ \frac{p_k}{2} \left| \frac{\sigma}{\alpha} \hat{w}_k \right| \mathbb{1}_{\{|\frac{\sigma}{\alpha} \hat{w}_k| \geq \frac{1}{2} p_k\}} \right] \right) + 2p_k e^{-\frac{1}{8} np_k} \\ &\leq 2p_k^{-1} \left( \mathbb{E} \left[ \left| \frac{\sigma}{\alpha} \hat{w}_k \right|^2 \right] \right) + 2p_k e^{-\frac{1}{8} np_k}\end{aligned}$$

where we invoked (32-33) from Lemma C.1 in the second line. Then, by (37) from Lemma C.2,

$$|\mathbb{E}[\epsilon_k \mathbb{1}_{A^c}]| \leq 2p_k^{-1} \left( \frac{\sigma^2 C_{L,2}}{\alpha^2 n} + 2p_k e^{-np_k/8} \right) \leq 2p_k^{-1} \left( \frac{\sigma^2 C_{L,2}}{\alpha^2 n} + \frac{16\gamma}{en} \right)$$

where we used  $xe^{-cnx} \leq \frac{\gamma}{cen}$  for any  $x \in [0, 1]$  and any  $c > 0$ . This concludes the proof of Lemma B.2.  $\square$

**Lemma B.3.** For any  $\alpha \in (0, \infty)$ , and integers  $K, n$  satisfying  $n \geq \log(Kn^{1/3})$ , we have

$$\mathbb{P} \left( |\hat{z}_k - p_k| > 96\sigma \sqrt{\frac{\log(Kn^{1/3})}{(\alpha^2 \wedge 1)n}} \right) \leq \frac{6}{K^3 n} .$$

**Proof of Lemma B.3.** Denoting  $\delta = c_1 \sigma \sqrt{\frac{\log(Kn^{1/3})}{(\alpha^2 \wedge 1)n}}$  with  $c_1 \geq 1$  a numerical constant to be set later, we get from (34) in Lemma C.1 and (36) in Lemma C.2 that

$$\begin{aligned} \mathbb{P}(|\hat{z}_k - p_k| > \delta) &\leq \mathbb{P}(|\hat{x}_k - p_k| > \frac{\delta}{2}) + \mathbb{P}\left(\frac{\sigma|\hat{w}_k|}{\alpha} > \frac{\delta}{2}\right) \leq 2 \left( e^{-\frac{n\delta^2}{2}} + e^{-\frac{n(\alpha\delta/\sigma)^2}{32}} + e^{-\frac{n(\alpha\delta/\sigma)}{8}} \right) \\ &\leq 6 e^{-\frac{c_1 \log(Kn^{1/3})}{32}} \end{aligned}$$

which is upper bounded by  $6/(K^3 n)$  for  $c_1 = 96$ . Lemma B.3 is proved.  $\square$

**Lemma B.4.** We have  $\text{Cov}(\hat{F}_\gamma(k), \hat{F}_\gamma(k')) \leq 0$  for any  $k, k' \in [K]$ ,  $k \neq k'$ , and any  $\gamma > 0$ .

**Proof of Lemma B.4.** We first state the definition of the negative association property.

*Definition* (See [5]) Random variables  $u_1, \dots, u_K$  are said to be negatively associated (NA) if for every pair of disjoint subsets  $A_1, A_2$  of  $\{1, \dots, K\}$ , and any component-wise increasing functions  $f_1, f_2$ ,

$$\text{Cov}(f_1(u_i, i \in A_1), f_2(u_j, j \in A_2)) \leq 0 . \quad (22)$$

By corollary 5 of Jiao et al. [4], random variables that are drawn from a multinomial distribution, are NA. Hence, the random variables  $\hat{X} = (\hat{x}_1, \dots, \hat{x}_K)$  are NA since  $(\hat{x}_1, \dots, \hat{x}_K)$  follows a multinomial distribution  $\sim \mathcal{M}(n; (p_k)_{k \in [K]})$ . Besides, the  $\hat{W} = (\hat{w}_k)_{k \in [K]}$  are NA, as any set of independent random variables are NA [5]. Then, we get that  $(\hat{X}, \hat{W}) = (\hat{x}_1, \dots, \hat{x}_K, \hat{w}_1, \dots, \hat{w}_K)$  are NA since a standard closure property of NA is that the union of two independent sets of NA random variables is NA [5]. We can therefore use the definition (22) of NA random variables to have

$$\text{Cov}(f_k(\hat{X}, \hat{W}), f_{k'}(\hat{X}, \hat{W})) \leq 0 , \quad \forall k, k' \in [K], k \neq k'$$

for  $f_k[(\hat{x}_1, \dots, \hat{x}_K, \hat{w}_1, \dots, \hat{w}_K)] = [T_{[0,2]}(\hat{x}_k + \sigma \hat{w}_k / \alpha)]^\gamma$ , which are component-wise increasing functions. The proof of Lemma B.4 is complete.  $\square$

## B.2 Bias and Variance on small values of $p_k$

**Lemma B.5.** Let  $\gamma, \alpha \in (0, \infty)$  and  $k \in [K]$  and  $c > 1$  be any numerical constant. If  $p_k \leq c/\sqrt{(\alpha^2 \wedge 1)n}$ , then

$$\left| \mathbb{E} \hat{F}_\gamma(k) - p_k^\gamma \right| \leq \frac{C}{((\alpha^2 \wedge 1)n)^{\gamma/2}} ,$$

$$\text{Var} \left( \hat{F}_\gamma(k) \right) \leq \frac{C'}{((\alpha^2 \wedge 1)n)^\gamma} ,$$

where  $C, C'$  are constants depending only on  $\gamma$  and  $c$ .

**Proof of Lemma B.5.** Recall that  $\hat{F}_\gamma(k) = (T_{[0,2]}[\hat{z}_k])^\gamma$ . We have for any  $s = 1, 2$ ,

$$\mathbb{E} \left[ (\hat{F}_\gamma(k))^s \right] = \mathbb{E} \left[ (T_{[0,2]}[\hat{z}_k])^{s\gamma} \right] \leq \mathbb{E} [|\hat{z}_k|^{s\gamma}] \leq \frac{2^{s\gamma} C_{BL,s\gamma}}{((\alpha^2 \wedge 1)n)^{s\gamma/2}} + 2^{s\gamma} p_k^{s\gamma}$$

using Lemma B.1. Then, we take  $s = 1$  to obtain the first bound announced in the lemma:

$$\begin{aligned} \left| \mathbb{E} \left[ \hat{F}_\gamma(k) \right] - p_k^\gamma \right| &\leq \mathbb{E} \left[ \hat{F}_\gamma(k) \right] + p_k^\gamma \leq \frac{2^\gamma C_{BL,\gamma}}{((\alpha^2 \wedge 1)n)^{\gamma/2}} + (2^\gamma + 1)p_k^\gamma \\ &\leq \frac{2^\gamma C_{BL,\gamma} + (2^\gamma + 1)c^\gamma}{((\alpha^2 \wedge 1)n)^{\gamma/2}} \end{aligned}$$

since  $p_k \leq c/\sqrt{(\alpha^2 \wedge 1)n}$ . We finally take  $s = 2$  to get the second bound of the lemma:

$$\text{Var} \left( \hat{F}_\gamma(k) \right) \leq \mathbb{E} \left[ \hat{F}_\gamma(k)^2 \right] \leq \frac{2^{2\gamma} C_{BL,2\gamma} + 2^{2\gamma} c^{2\gamma}}{((\alpha^2 \wedge 1)n)^\gamma}.$$

Lemma B.5 is proved.  $\square$

### B.3 Bias and Variance on large values of $p_k$

**Lemma B.6.** For any  $\gamma, \alpha \in (0, \infty)$  and  $k \in [K]$  with  $p_k \in (0, 1]$ , we have

$$\left| \mathbb{E} \left[ \hat{F}_\gamma(k)^s \right] - p_k^{s\gamma} \right| \leq C \left( p_k^{s\gamma} e^{-\frac{n}{128\sigma^2}((\alpha \wedge 1)p_k)^2} + \frac{\mathbb{1}_{\{s\gamma \geq 2\}}}{((\alpha^2 \wedge 1)n)^{s\gamma/2}} + \frac{p_k^{s\gamma-2}}{(\alpha^2 \wedge 1)n} \right), \quad \forall s = 1, 2,$$

where  $C$  is a constant depending only on  $\gamma$ .

The proof of Lemma B.6 is inspired by the variance bound [4, Lemma 28] as it is based on Taylor's formula with the second derivatives of  $x^\gamma$  and  $x^{2\gamma}$ . However, the result in [4] holds for  $\gamma \in (0, 1)$  in the case of direct observations (no privacy), whereas Lemma B.6 holds for any  $\gamma > 0$  in the case of sanitized observations (privacy). We postpone the (relatively long) proof to the end of section B.3.

**Lemma B.7.** Let  $\gamma, \alpha \in (0, \infty)$  and  $k \in [K]$  and  $c > 0$  be any numerical constant. If  $p_k \geq c/\sqrt{(\alpha^2 \wedge 1)n}$ , then

$$\left| \mathbb{E} \left[ \hat{F}_\gamma(k)^s \right] - p_k^{s\gamma} \right| \leq C \left( \frac{1}{((\alpha^2 \wedge 1)n)^{s\gamma/2}} + \mathbb{1}_{\{s\gamma \geq 2\}} \frac{p_k^{s\gamma-2}}{(\alpha^2 \wedge 1)n} \right), \quad \forall s = 1, 2,$$

where  $C$  is a constant depending only on  $\gamma$  and  $c$ .

**Proof of Lemma B.7.** We invoke Lemma B.6. We bound the first error term

$$p_k^{s\gamma} e^{-\frac{n}{128\sigma^2}((\alpha \wedge 1)p_k)^2} \leq \left( \frac{64\sigma^2 s\gamma}{(\alpha^2 \wedge 1)en} \right)^{s\gamma/2}$$

where we used  $x^{s\gamma} e^{-cnx^2} \leq \left( \frac{s\gamma}{2cen} \right)^{s\gamma/2}$  for  $x \in [0, 1]$  and any  $c > 0$ . The third error term of Lemma B.6 satisfies, for  $s\gamma \in (0, 2)$

$$\mathbb{1}_{\{s\gamma \in (0,2)\}} \frac{p_k^{s\gamma-2}}{(\alpha^2 \wedge 1)n} \leq \frac{\left( \frac{c}{\sqrt{(\alpha^2 \wedge 1)n}} \right)^{s\gamma-2}}{(\alpha^2 \wedge 1)n} \leq \frac{c^{s\gamma-2}}{((\alpha^2 \wedge 1)n)^{s\gamma/2}} \quad (23)$$

since  $p_k \geq c/\sqrt{(\alpha^2 \wedge 1)n}$ . The proof of Lemma B.7 is complete.  $\square$

**Lemma B.8.** Under the assumptions of Lemma B.7, we have

$$\text{Var} \left( \hat{F}_\gamma(k) \right) \leq C \left( \frac{1}{((\alpha^2 \wedge 1)n)^\gamma} + \mathbb{1}_{\{\gamma \geq 1\}} \frac{p_k^{2\gamma-2}}{(\alpha^2 \wedge 1)n} \right)$$

for a constant  $C$  depending only on  $\gamma$  (and  $c$ ).

**Proof of Lemma B.8.** We have, similarly to [4],

$$\begin{aligned} \text{Var} \left( \hat{F}_\gamma(k) \right) &= \mathbb{E} \left[ \hat{F}_\gamma(k)^2 \right] - \left( \mathbb{E} \hat{F}_\gamma(k) \right)^2 = \mathbb{E} \left[ \hat{F}_\gamma(k)^2 \right] - p_k^{2\gamma} + p_k^{2\gamma} - \left( \mathbb{E} \hat{F}_\gamma(k) \right)^2 \\ &\leq \left| \mathbb{E} \left[ \hat{F}_\gamma(k)^2 \right] - p_k^{2\gamma} \right| + \left| p_k^{2\gamma} - \left( \mathbb{E} \hat{F}_\gamma(k) - p_k^\gamma + p_k^\gamma \right)^2 \right| \\ &\leq \left| \mathbb{E} \left[ \hat{F}_\gamma(k)^2 \right] - p_k^{2\gamma} \right| + \left| \mathbb{E} \hat{F}_\gamma(k) - p_k^\gamma \right|^2 + 2p_k^\gamma \left| \mathbb{E} \hat{F}_\gamma(k) - p_k^\gamma \right|. \end{aligned} \quad (24)$$

Using Lemma B.7 to bound the two first terms of (24), and Lemma B.6 for the last term, we get

$$\begin{aligned} \text{Var} \left( \hat{F}_\gamma(k) \right) &\leq C \left( \frac{1}{((\alpha^2 \wedge 1)n)^\gamma} + \mathbb{1}_{\{\gamma \geq 1\}} \frac{p_k^{2\gamma-2}}{(\alpha^2 \wedge 1)n} \right. \\ &\quad + \frac{1}{((\alpha^2 \wedge 1)n)^\gamma} + \mathbb{1}_{\{\gamma \geq 2\}} \frac{p_k^{2(\gamma-2)}}{((\alpha^2 \wedge 1)n)^2} \\ &\quad \left. + 2p_k^{2\gamma} e^{-\frac{n}{128\sigma^2}((\alpha \wedge 1)p_k)^2} + \frac{2p_k^\gamma \mathbb{1}_{\{\gamma \geq 2\}}}{((\alpha^2 \wedge 1)n)^{\gamma/2}} + \frac{2p_k^{2\gamma-2}}{(\alpha^2 \wedge 1)n} \right). \end{aligned} \quad (25)$$

We bound the fifth term of (25):

$$2p_k^{2\gamma} e^{-\frac{n}{128\sigma^2}((\alpha \wedge 1)p_k)^2} \leq 2 \left( \frac{128\sigma^2\gamma}{(\alpha^2 \wedge 1)en} \right)^\gamma$$

using  $x^{2\gamma} e^{-c'nx^2} \leq \left( \frac{\gamma}{c'en} \right)^\gamma$  for any  $x \in [0, 1]$  and any  $c' > 0$ . Hence, the first, third and fifth terms of (25) are of the order of  $((\alpha^2 \wedge 1)n)^{-\gamma}$  at most. We now bound the fourth term of (25) using  $p_k \geq c/\sqrt{\alpha^2 \wedge 1}n$ :

$$\frac{p_k^{2(\gamma-2)}}{((\alpha^2 \wedge 1)n)^2} = \frac{p_k^{2\gamma-2} p_k^{-2}}{((\alpha^2 \wedge 1)n)^2} \leq \frac{p_k^{2\gamma-2}}{c^2(\alpha^2 \wedge 1)n}$$

and similarly the sixth term of (25):

$$\frac{2p_k^\gamma \mathbb{1}_{\{\gamma \geq 2\}}}{((\alpha^2 \wedge 1)n)^{1+(\gamma/2)-1}} \leq \frac{2p_k^\gamma (p_k/c)^{\gamma-2} \mathbb{1}_{\{\gamma \geq 2\}}}{(\alpha^2 \wedge 1)n} = \frac{2p_k^{2\gamma-2} \mathbb{1}_{\{\gamma \geq 2\}}}{c^{\gamma-2}(\alpha^2 \wedge 1)n}.$$

Hence, we have the desired bound for the second, fourth and sixth terms of (25). Finally, for the last term of (25) we have

$$\frac{p_k^{2\gamma-2}}{(\alpha^2 \wedge 1)n} = \frac{p_k^{2\gamma-2} \mathbb{1}_{\{\gamma \in (0,1)\}}}{(\alpha^2 \wedge 1)n} + \frac{p_k^{2\gamma-2} \mathbb{1}_{\{\gamma \geq 1\}}}{(\alpha^2 \wedge 1)n} \leq \frac{2c^{2\gamma-2}}{((\alpha^2 \wedge 1)n)^\gamma} + \frac{p_k^{2\gamma-2} \mathbb{1}_{\{\gamma \geq 1\}}}{(\alpha^2 \wedge 1)n}$$

using (23) for  $s = 2$ . This concludes the proof of Lemma B.8.  $\square$

**Proof of Lemma B.6.** Denoting  $f_s(x) = x^{s\gamma}$  for  $s = 1, 2$ , and  $Y = T_{[0,2]}[\hat{z}_k]$ , we have by Taylor's formula,

$$f_s(Y) = f_s(p_k) + f'_s(p_k)(Y - p_k) + R(Y, p_k) \quad (26)$$

where the remainder is defined by

$$R(Y, p_k) = \int_{p_k}^Y (Y - w) f''_s(w) dw = \frac{1}{2} f''_s(w_Y) (Y - p_k)^2 \quad (27)$$

where  $w_Y$  lies between  $Y$  and  $p_k$ . We get

$$|\mathbb{E} f_s(Y) - f_s(p_k)| \leq |\mathbb{E} R(Y, p_k)| + |\mathbb{E} f'_s(p_k)(Y - p_k)|. \quad (28)$$

Thus, to prove the lemma, it suffices to bound the remainder  $|\mathbb{E} R(Y, p_k)|$  and the first order term  $|\mathbb{E} f'_s(p_k)(Y - p_k)|$ . We control the latter using Lemma B.2,

$$|\mathbb{E} f'_s(p_k)(Y - p_k)| = s\gamma p_k^{s\gamma-1} |\mathbb{E}(Y - p_k)| \leq \frac{2s\gamma p_k^{s\gamma-2}}{(\alpha^2 \wedge 1)n} \left( \sigma^2 C_{L,2} + \frac{16\gamma}{e} \right).$$



For the remainder, we use the decomposition

$$|\mathbb{E} R(Y, p_k)| \leq \mathbb{E} [|R(Y, p_k)| \mathbb{1}(Y < p_k/2)] + \mathbb{E} [|R(Y, p_k)| \mathbb{1}(Y \geq p_k/2)] \quad (29)$$

and we bound separately the two terms of the RHS.

1°. *First term in the RHS of (29).*

$$\begin{aligned} \mathbb{E} [|R(Y, p_k)| \mathbb{1}(Y < p_k/2)] &\leq \sup_{y \leq p_k/2} |R(y, p_k)| \mathbb{E} [\mathbb{1}(Y < p_k/2)] \\ &= \sup_{y \leq p_k/2} |R(y, p_k)| \mathbb{E} [\mathbb{1}(\hat{z}_k < p_k/2)] \\ &\leq \sup_{y \leq p_k/2} |R(y, p_k)| 3 e^{-\frac{n}{128\sigma^2}((\alpha \wedge 1)p_k)^2} \end{aligned}$$

using Lemma B.1. We control  $R(y, p_k)$  for any  $y \in [0, p_k/2]$ ,

$$\begin{aligned} |R(y, p_k)| &\leq \int_y^{p_k} (w - y) |f_s''(w)| dw \leq \int_y^{p_k} (w - y) s\gamma |s\gamma - 1| w^{s\gamma-2} dw \\ &\leq s\gamma |s\gamma - 1| \int_y^{p_k} w^{s\gamma-1} dw \leq s\gamma |s\gamma - 1| \int_0^{p_k} w^{s\gamma-1} dw = |s\gamma - 1| p_k^{s\gamma}. \end{aligned}$$

We gather the last two displays to get

$$\mathbb{E} [|R(Y, p_k)| \mathbb{1}(Y < p_k/2)] \leq |s\gamma - 1| p_k^{s\gamma} 3 e^{-\frac{n}{128\sigma^2}((\alpha \wedge 1)p_k)^2}.$$

2°. *Second term in the RHS of (29).* We separate our analysis in two different ranges of values of  $\gamma$ .

2°.1. *Case  $s\gamma \in (0, 2)$ :* Starting from (27) we have

$$\begin{aligned} \mathbb{E} [|R(Y, p_k)| \mathbb{1}(Y \geq p_k/2)] &= \frac{s\gamma |s\gamma - 1|}{2} \mathbb{E} [w_Y^{s\gamma-2} (Y - p_k)^2 \mathbb{1}(Y \geq p_k/2)] \quad (30) \\ &\leq \frac{s\gamma |s\gamma - 1|}{2} \left(\frac{p_k}{2}\right)^{s\gamma-2} \mathbb{E} [(Y - p_k)^2] \\ &\leq s\gamma |s\gamma - 1| 2^{1-s\gamma} p_k^{s\gamma-2} \frac{C_{BL,2}}{(\alpha^2 \wedge 1)n} \end{aligned}$$

where we used  $\mathbb{E} [(Y - p_k)^2] \leq \mathbb{E} [(\hat{z}_k - p_k)^2]$  and Lemma B.1.

2°.2. *Case  $s\gamma \geq 2$ :* A plug of  $w_Y^{s\gamma-2} \leq p_k^{s\gamma-2} + Y^{s\gamma-2}$  into (30) gives

$$\mathbb{E} [|R(Y, p_k)| \mathbb{1}(Y \geq p_k/2)] \leq \frac{s\gamma |s\gamma - 1|}{2} \mathbb{E} [(p_k^{s\gamma-2} + Y^{s\gamma-2})(Y - p_k)^2 \mathbb{1}(Y \geq p_k/2)]. \quad (31)$$

We bound the first part of (31) as in (30),

$$\mathbb{E} [p_k^{s\gamma-2} (Y - p_k)^2 \mathbb{1}(Y \geq p_k/2)] \leq p_k^{s\gamma-2} \frac{C_{BL,2}}{((\alpha^2 \wedge 1)n)}.$$

For the second part of (31), we get from Cauchy-Schwarz that

$$\begin{aligned} \mathbb{E} [Y^{s\gamma-2} (Y - p_k)^2 \mathbb{1}(Y \geq 2p_k)] &\leq \mathbb{E} [Y^{2(s\gamma-2)}]^{1/2} \mathbb{E} [(Y - p_k)^4]^{1/2} \\ &\leq \left( \frac{2^{2(s\gamma-2)} C_{BL,2(s\gamma-2)}}{((\alpha^2 \wedge 1)n)^{s\gamma-2}} + 2^{2(s\gamma-2)} p_k^{2(s\gamma-2)} \right)^{1/2} \left( \frac{C_{BL,4}}{((\alpha^2 \wedge 1)n)^2} \right)^{1/2} \\ &\leq \left( \frac{2^{s\gamma-2} \sqrt{C_{BL,2(s\gamma-2)}}}{((\alpha^2 \wedge 1)n)^{(s\gamma-2)/2}} + 2^{s\gamma-2} p_k^{s\gamma-2} \right) \frac{\sqrt{C_{BL,4}}}{(\alpha^2 \wedge 1)n} \end{aligned}$$

where in the second inequality we used  $\mathbb{E} [Y^{2r}] \leq \mathbb{E} [\hat{z}_k^{2r}]$  and  $\mathbb{E} [(Y - p_k)^{2r}] \leq \mathbb{E} [(\hat{z}_k - p_k)^{2r}]$  for any  $r > 0$  and Lemma B.1; in the third inequality we used  $\sqrt{a+b} \leq \sqrt{a} + \sqrt{b}$  for any  $a, b > 0$ . A plug of the last two displays into (31) concludes the case  $s\gamma \geq 2$ .

Going back to (29), we have bounded the remainder  $\mathbb{E} R(Y, p_k)$ . Lemma B.6 is proved.  $\square$

## C Auxiliary lemmas for upper bounds

**Lemma C.1.** Let  $p \in (0, 1]$ , and  $x_1, \dots, x_n \stackrel{iid}{\sim} \mathbf{B}(p)$  be independent Bernoulli random variables with parameter  $p$ . Then, the mean  $\hat{x} = \frac{1}{n} \sum_{i=1}^n x_i$  satisfies, for any  $\delta > 0$ ,

$$\mathbb{P}(\hat{x} \leq (1 - \delta)p) \leq e^{-\frac{\delta^2 np}{2}}, \quad (32)$$

$$\mathbb{P}(\hat{x} \geq (1 + \delta)p) \leq e^{-\frac{\delta^2 np}{2 + \delta}}, \quad (33)$$

and

$$\mathbb{P}(|\hat{x} - p| \geq \delta) \leq 2e^{-2\delta^2 n}. \quad (34)$$

We also have, for any  $r > 0$ ,

$$\mathbb{E}[|\hat{x} - p|^r] \leq \frac{C_{B,r}}{n^{r/2}} \quad (35)$$

where  $C_{B,r}$  is a constant depending only on  $r$ .

**Proof of Lemma C.1.** The concentration inequalities (32-33) are one form of Chernoff bounds. The control (34) is Hoeffding's inequality applied to i.i.d Bernoulli random variables. Finally, for (35), see [8] or adapt the proof of Lemma C.2 below.  $\square$

**Lemma C.2.** Let  $w_1, \dots, w_n \stackrel{iid}{\sim} \mathbf{L}(1)$  be independent Laplace random variables with parameter 1. Denoting the mean by  $\hat{w} = \frac{1}{n} \sum_{i=1}^n w_i$ , we have

$$\begin{aligned} \mathbb{P}(\hat{w} > t) \vee \mathbb{P}(\hat{w} < -t) &\leq \exp\left[-\frac{n}{2}\left(\frac{t^2}{4} \wedge \frac{t}{2}\right)\right] \\ &\leq \exp\left[-\frac{n}{8}t^2\right] + \exp\left[-\frac{n}{4}t\right]. \end{aligned} \quad (36)$$

Besides, for any real  $r > 0$ , there exists a constant  $C_{L,r} \geq 1$ , depending only on  $r$ , such that

$$\mathbb{E}(|\hat{w}|^r) \leq \frac{C_{L,r}}{n^{r/2}}. \quad (37)$$

**Proof of Lemma C.2.** A random variable  $x$  is said to be sub-exponential with parameter  $\lambda$ , denoted  $x \sim \text{subE}(\lambda)$ , if  $\mathbb{E}x = 0$  and its moment generating function satisfies

$$\mathbb{E}[e^{sx}] \leq e^{\lambda^2 s^2 / 2}, \quad \forall |s| < \frac{1}{\lambda}.$$

Let  $x_1, \dots, x_n$  be independent random variables such that  $x_i \sim \text{subE}(\lambda)$ . Bernstein's inequality [8] entails that, for any  $t > 0$ , the mean  $\hat{x} = \frac{1}{n} \sum_{i=1}^n x_i$  satisfies

$$\mathbb{P}(\hat{x} > t) \vee \mathbb{P}(\hat{x} < -t) \leq \exp\left[-\frac{n}{2}\left(\frac{t^2}{\lambda^2} \wedge \frac{t}{\lambda}\right)\right]. \quad (38)$$

Then, for any real  $r > 0$  we have

$$\mathbb{E}|\hat{x}| = \int_0^\infty \mathbb{P}(|\hat{x}|^r > t) dt = \int_0^\infty \mathbb{P}(|\hat{x}| > t^{1/r}) dt \leq \int_0^\infty 2e^{-\frac{nt^{2/r}}{2\lambda^2}} dt + \int_0^\infty 2e^{-\frac{nt^{1/r}}{2\lambda}} dt$$

so that, using  $u = \frac{nt^{2/r}}{2\lambda^2}$  and  $v = \frac{nt^{1/r}}{2\lambda}$ ,

$$\begin{aligned} \mathbb{E}|\hat{x}| &\leq \left(\frac{2\lambda^2}{n}\right)^{r/2} r \int_0^\infty e^{-u} u^{(r/2)-1} du + 2 \left(\frac{2\lambda}{n}\right)^r r \int_0^\infty e^{-v} v^{r-1} dv \\ &= \left(\frac{2\lambda^2}{n}\right)^{r/2} r \Gamma(r/2) + 2 \left(\frac{2\lambda}{n}\right)^r r \Gamma(r) \\ &\leq 2^{r+2} \lambda^r r [\Gamma(r/2) + \Gamma(r)] \frac{1}{n^{r/2}}. \end{aligned} \quad (39)$$

Let  $w \sim L(1)$  be a random variable of Laplace distribution with parameter 1. Observe that  $\mathbb{P}(|w| > t) = e^{-t}$  for  $t \geq 0$ , and

$$\mathbb{E}[e^{sw}] \leq e^{2s^2}, \quad \text{if } |s| < \frac{1}{2}.$$

Hence,  $w$  is sub-exponential with parameter 2, i.e.  $w \sim \text{subE}(2)$ . We can take  $\lambda = 2$  in (38-39) to conclude the proof of Lemma C.2, choosing  $C_{L,r} = 2^{2r+2}r [\Gamma(r/2) + \Gamma(r)]$ .  $\square$

## D Proofs of lower bounds

**Proof of Proposition 2.2.** Recall that  $\hat{z}_k = \frac{1}{n} \sum_{i=1}^n z_{ik}$ , where  $z_{ik} = \mathbb{1}_{\{x_i=k\}} + \frac{\sigma}{\alpha} \cdot w_{ik}$ , with  $\mathbb{E} z_{ik} = p_k$  and  $\text{Var}(z_{ik}) = p_k(1-p_k) + \frac{2\sigma^2}{\alpha^2}$ . Note that  $\tilde{\tau} := \frac{\sigma}{\sqrt{\alpha^2 n}}$  lies in  $[0, 2]$ , and that  $\text{Var}(z_{ik}) \geq (\sqrt{n}\tilde{\tau})^2$ . By the central limit theorem,  $\sqrt{n} \frac{\hat{z}_k - p_k}{\sqrt{\text{Var}(z_{ik})}}$  has an asymptotic standard normal distribution, so we have  $\mathbb{P}(\sqrt{n} \frac{\hat{z}_k - p_k}{\sqrt{\text{Var}(z_{ik})}} \geq 1) \geq c_1$  for some numerical constant  $c_1 > 0$  and  $n$  large enough. We write  $\hat{z}_k = \sqrt{n} \frac{\hat{z}_k - p_k}{\sqrt{\text{Var}(z_{ik})}} \cdot \frac{\sqrt{\text{Var}(z_{ik})}}{\sqrt{n}} + p_k \geq \frac{\sqrt{\text{Var}(z_{ik})}}{\sqrt{n}}$  with probability larger than  $c_1$ , thus leading to

$$\mathbb{E} [(T_{[0,2]}(\hat{z}_k))^\gamma] - p_k^\gamma \geq c_1 \left( T_{[0,2]} \left( \frac{\sqrt{\text{Var}(z_{ik})}}{\sqrt{n}} \right) \right)^\gamma - p_k^\gamma = c_1 \tilde{\tau}^\gamma - p_k^\gamma \geq \frac{c_1 \tilde{\tau}^\gamma}{2}, \quad \text{as } n \rightarrow \infty$$

for all  $p_k \leq (\frac{c_1}{2})^{1/\gamma} \tilde{\tau}$ . Denoting by  $\mathcal{K}_{\leq (c_1/2)^{1/\gamma} \tilde{\tau}}$  the number of such  $p_k$  satisfying the latter inequality, we get

$$\sum_{k \in \mathcal{K}_{\leq (c_1/2)^{1/\gamma} \tilde{\tau}}} \mathbb{E} [(T_{[0,2]}(\hat{z}_k))^\gamma] - p_k^\gamma \geq \frac{c_1 \tilde{\tau}^\gamma |\mathcal{K}_{\leq (c_1/2)^{1/\gamma} \tilde{\tau}}|}{2}, \quad \text{as } n \rightarrow \infty. \quad (40)$$

Hence, the lower bound announced in Proposition 2.2 holds in particular for any  $p = (p_1, \dots, p_K) \in \mathcal{P}_K$  such that  $|\mathcal{K}_{\leq (c_1/2)^{1/\gamma} \tilde{\tau}}| = K$ . However, this last equality entails that  $K$  satisfies the following restriction  $K \gtrsim_\gamma (\tilde{\tau})^{-1} \gtrsim_\gamma \sqrt{\alpha^2 n}$  since  $\sum_{k=0}^K p_k = 1$ . We remove this restriction in the sequel.

Let  $C > 0$  be some constant that will be set later, and that only depends on  $\gamma$ . If  $K \leq C \left( 1 \vee (\alpha^2 n)^{\frac{\gamma}{2} - \frac{1}{2}} \right)$ , then the lower bound of Proposition 2.2 follows directly from Theorem 2.6. We can therefore assume that

$$K \geq C \left( 1 \vee (\alpha^2 n)^{\frac{\gamma}{2} - \frac{1}{2}} \right). \quad (41)$$

Let  $p = (p_1, \dots, p_K) \in \mathcal{P}_K$  such that  $p_j \leq (\frac{c_1}{2})^{1/\gamma} \tilde{\tau}$  for all  $j \in [K-1]$ , and  $p_K \in [0, 1]$  so that  $\sum_{k=1}^K p_k = 1$ . By Lemma B.5 and B.7, the bias of estimation of  $p_K$  is bounded by

$$|\mathbb{E} [(T_{[0,2]}(\hat{z}_K))^\gamma] - p_K^\gamma| \leq C' \left( \frac{1}{(\alpha^2 n)^{\gamma/2}} + \mathbb{1}_{\{\gamma \geq 2\}} \frac{1}{\alpha^2 n} \right),$$

where  $C'$  is a constant depending only on  $\gamma$ . Combining with (40), we get

$$\begin{aligned} \sum_{k=1}^K \mathbb{E} (T_{[0,2]}(\hat{z}_k))^\gamma - p_k^\gamma &\geq \frac{c_1 \tilde{\tau}^\gamma (K-1)}{2} - \frac{C'}{(\alpha^2 n)^{\gamma/2}} - \mathbb{1}_{\{\gamma \geq 2\}} \frac{C'}{\alpha^2 n} \\ &\geq \frac{c_1 K}{4(\alpha^2 n)^{\gamma/2}} - \frac{C'}{(\alpha^2 n)^{\gamma/2}} - \mathbb{1}_{\{\gamma \geq 2\}} \frac{C'}{\alpha^2 n}. \end{aligned}$$

Hence, it suffices to choose a large enough constant  $C$  in (41) to have

$$\sum_{k=1}^K \mathbb{E} (T_{[0,2]}(\hat{z}_k))^\gamma - p_k^\gamma \geq \frac{C'' K}{(\alpha^2 n)^{\gamma/2}}$$

for some constant  $C''$  depending only on  $\gamma$ . We have proved the desired lower bound under the assumption (41). The proof of Proposition 2.2 is complete.  $\square$

**Proof of Theorem 2.6.** Fix  $\gamma > 0, \gamma \neq 1$ . Let  $\tilde{\tau} := \frac{\tilde{C}}{\sqrt{\alpha^2 n}}$  for a constant  $\tilde{C} \in (0, 1)$  that will be set later, and which only depends on  $\gamma$ . Let us start with the case  $K = 2$ . Define two probability vectors  $p = (p_1, p_2) = (1 - \tilde{\tau}, \tilde{\tau})$  and  $q = (q_1, q_2) = (1 - \tilde{\tau}/2, \tilde{\tau}/2)$ . Then for a small enough constant  $\tilde{C}$ , we have

$$\begin{aligned} \Delta &:= |F_\gamma(p) - F_\gamma(q)| = |(1 - \tilde{\tau})^\gamma - (1 - \tilde{\tau}/2)^\gamma + \tilde{\tau}^\gamma - (\tilde{\tau}/2)^\gamma| \\ &= \left| -\frac{\gamma\tilde{\tau}}{2} + O(\tilde{\tau}^2) + \tilde{\tau}^\gamma(1 - \frac{1}{2^\gamma}) \right| \end{aligned}$$

where we used  $(1 - x)^\gamma = 1 - \gamma x + O(x^2)$  for any real  $x \in (0, \tilde{C})$ . If  $\gamma \in (0, 1)$ , we can choose  $\tilde{C}$  small enough to have

$$\Delta = \tilde{\tau}^\gamma \left| -\frac{\gamma\tilde{\tau}^{1-\gamma}}{2} + O(\tilde{\tau}^{2-\gamma}) + (1 - \frac{1}{2^\gamma}) \right| \geq C\tilde{\tau}^\gamma$$

for some constant  $C$  depending only on  $\gamma$ . Similarly, if  $\gamma > 1$ , we have

$$\Delta = \tilde{\tau} \left| -\frac{\gamma}{2} + O(\tilde{\tau}) + \tilde{\tau}^{\gamma-1}(1 - \frac{1}{2^\gamma}) \right| \geq C\tilde{\tau} .$$

For any  $\alpha$ -LDP mechanism  $Q$ , denote by  $Qp$  and  $Qq$  the measures corresponding to the channel  $Q$  applied to the probability vectors  $p$  and  $q$ . Corollary 3 of [3] ensures that the Kullback-Leibler divergence between  $Qp$  and  $Qq$  is bounded by

$$D_{kl}(Qp, Qq) \leq 4(e^\alpha - 1)^2 n (d_{TV}(p, q))^2 ,$$

i.e. by  $n$  times the square of the total variation distance between  $p$  and  $q$ , up to a constant depending on  $\alpha$ . Then we have

$$D_{kl}(Qp, Qq) \leq 4(e^\alpha - 1)^2 n \left( \sum_{k=1}^2 |p_k - q_k| \right)^2 \leq 4(e^\alpha - 1)^2 n \tilde{\tau}^2 \leq 36\tilde{C}^2 \quad (42)$$

where the last inequality follows from  $e^x - 1 \leq 3x$  for any  $x \in [0, 1]$ .

For any vector  $\theta = (\theta_1, \theta_2), \theta_i \geq 0$ , we denote the functional at  $\theta$  by  $F_\gamma(\theta) = \sum_{k=1}^2 \theta_k^\gamma$ . We use a standard lower bound method based on two hypotheses, see e.g. Theorem 2.1 and 2.2 in [7], to get for any estimator  $\hat{F}$ ,

$$\sup_{\theta \in \{p, q\}} \mathbb{P}_\theta \left( |\hat{F} - F_\gamma(\theta)| \geq \frac{\Delta}{2} \right) \geq \frac{1 - \sqrt{D_{kl}(Qp, Qq)/2}}{2} .$$

Then we deduce from (42) that

$$\sup_{\theta \in \{p, q\}} \mathbb{P}_\theta \left( |\hat{F} - F_\gamma(\theta)| \geq \frac{\Delta}{2} \right) \geq \frac{1 - 3\sqrt{2}\tilde{C}}{2} \geq \frac{1}{4} ,$$

choosing  $\tilde{C} \leq 1/(6\sqrt{2})$ . We have proved the desired lower bound in the case  $K = 2$ .

We can actually prove the same lower bound for any integer  $K \geq 2$ , with the following slight modification in the proof written above. Choose  $p_k, q_k, k \geq 3$  such that  $p_k = q_k$  and  $p_k \leq \tilde{C}/(4Kn)$ . Then change the  $p_1$  and  $q_1$  above accordingly (to have probability vectors). This affects neither the order of the separation  $\Delta$ , nor the bound on the KL-divergence between the measures  $Qp$  and  $Qq$ . This concludes the proof of Theorem 2.6.  $\square$

**Proof of Theorem 2.7.** If  $K < 4$ , then the lower bounds are a direct consequence of Theorem 2.6. We assume therefore that  $K \geq 4$ . For the ease of exposition, we also assume that  $K$  is even (the case of an odd  $K$  being similar). Let  $\tilde{K}$  be a positive even integer in  $[K]$ . Let  $p = (p_1, \dots, p_K)$  be any probability vector such that two consecutive coordinates are equal  $p_{2k-1} = p_{2k}$  for  $k \in [\tilde{K}/2]$ , and the remaining coordinates satisfy  $p_k = p_{k'}$  for all  $k, k' \geq \tilde{K} + 1$ . Similarly, let  $\delta = (\delta_1, \dots, \delta_K)$  be a vector of perturbations such that, two consecutive perturbations are equal  $\delta_{2k-1} = \delta_{2k}, k \in [\tilde{K}/2]$ ,

and the others are equal to zero:  $\delta_k = 0, \forall k \geq \tilde{K} + 1$ . Each perturbation is smaller than (half of) the corresponding probability:  $0 \leq \delta_k \leq p_k/2, k \in [\tilde{K}]$ . Given any  $k \in [K/2]$  and any vector  $q = (q_1, \dots, q_K)$ , define the operator  $T_k(q) = (0, \dots, 0, q_{2k-1}, -q_{2k}, 0, \dots, 0)$ . We are now ready to introduce the following collection of vectors  $p^{(\nu)}, \nu \in \mathcal{V}\{-1, 1\}^{\tilde{K}/2}$ :

$$\begin{aligned} p^{(\nu)} &= p + \sum_{k=1}^{\tilde{K}/2} \nu_k T_k(\delta) \\ &= (p_1, p_2, p_3, p_4, \dots, p_{K-1}, p_K) + (\nu_1 \delta_1, -\nu_1 \delta_2, \dots, \nu_{\tilde{K}/2} \delta_{\tilde{K}-1}, -\nu_{\tilde{K}/2} \delta_{\tilde{K}}, 0, \dots, 0) \\ &= (p_2, p_2, p_4, p_4, \dots, p_{\tilde{K}}, p_{\tilde{K}}, p_K, \dots, p_K) + (\nu_1 \delta_2, -\nu_1 \delta_2, \dots, \nu_{\tilde{K}/2} \delta_{\tilde{K}}, -\nu_{\tilde{K}/2} \delta_{\tilde{K}}, 0, \dots, 0) . \end{aligned}$$

Observe that each  $p^{(\nu)}, \nu \in \mathcal{V}\{-1, 1\}^{\tilde{K}/2}$ , is a vector of probability. We bound from below the difference between  $F_\gamma(p^{(\nu)})$  and  $F_\gamma(p)$  in the next lemma, whose proof is postponed at the end of the section.

**Lemma D.1.** *For any  $\gamma \in (0, 2), \gamma \neq 1$ , and any  $\nu \in \mathcal{V}\{-1, 1\}^{\tilde{K}/2}$ , we have*

$$|F_\gamma(p^{(\nu)}) - F_\gamma(p)| \geq C \sum_{k=1}^{\tilde{K}/2} p_{2k}^{\gamma-2} \delta_{2k}^2 =: R$$

for a constant  $C > 0$  depending only on  $\gamma$ .

We will show that it is hard to know if the data come from  $p$  or a uniform mixture of the  $p^{(\nu)}, \nu \in \mathcal{V}$ . We do so by using Theorem A.1 of [6], with the notations of [6]. For any fixed  $\alpha$ -LDP interactive mechanism  $Q$ , we write  $Q^n := (Qp)^n \in \text{conv} \left( Q\mathcal{P}_{\leq F_\gamma(p)}^{(n)} \right)$  and  $\bar{Q}^n := 2^{-\tilde{K}/2} \sum_{\nu \in \mathcal{V}} (Qp^{(\nu)})^n \in \text{conv} \left( Q\mathcal{P}_{\geq F_\gamma(p)+R}^{(n)} \right)$ . With the notations of [6] and standard relations between probability metrics, we have that the upper affinity satisfies

$$\eta_A^{(n)}(Q, R) \geq \pi(Q^n, \bar{Q}^n) = 1 - d_{TV}(Q^n, \bar{Q}^n) \geq 1 - \sqrt{D_{kl}(Q^n, \bar{Q}^n)/2} . \quad (43)$$

We can bound the KL-divergence  $D_{kl}(Q^n, \bar{Q}^n)$  as in the proof of Theorem 4.2 in [2], and have

$$D_{kl}(Q^n, \bar{Q}^n) \leq \frac{n(e^{2\alpha} - e^{-2\alpha})^2}{4} \|\delta\|_2^2 .$$

Hence, it suffices to choose a  $\delta$  satisfying the condition

$$\|\delta\|_2^2 \leq \frac{2}{n(e^{2\alpha} - e^{-2\alpha})^2} , \quad (44)$$

to have  $\eta_A^{(n)}(Q, R) \geq \frac{1}{2}$ . Denoting  $\Delta_A^{(n)}(Q, \eta) := \sup\{\Delta \geq 0 : \eta_A^{(n)}(Q, \Delta) > \eta\}$  as in [6], we will get for any  $\eta \in (0, 1/2)$ ,

$$\Delta_A^{(n)}(Q, \eta) \geq R$$

where  $R$  is defined in Lemma D.1 above. It will then follow from Theorem A.1 of [6] that

$$\inf_Q \inf_{\hat{F}} \sup_{p \in \mathcal{P}} \mathbb{E} \left[ (\hat{F} - F_\gamma(p))^2 \right] \geq \left( \frac{R}{2} \right)^2 \frac{\eta}{2} ,$$

for any  $\eta \in (0, 1/2)$ . Taking  $\eta = 1/4$  we will have

$$\inf_Q \inf_{\hat{F}} \sup_{p \in \mathcal{P}} \mathbb{E} \left[ (\hat{F} - F_\gamma(p))^2 \right] \geq \frac{C^2}{32} \left( \sum_{k=1}^{\tilde{K}/2} p_{2k}^{\gamma-2} \delta_{2k}^2 \right)^2 .$$

To choose a  $\delta$  fulfilling (44), we consider two cases according to the values of  $K$ .

1°. In the case where  $K < n(e^{2\alpha} - e^{-2\alpha})^2$ , we choose  $\tilde{K} = K$ , and take  $\delta_k = (4\sqrt{\tilde{K}n}(e^{2\alpha} - e^{-2\alpha}))^{-1}$ ,  $k \in [K]$ . We take  $p_k = 2\delta_k$ ,  $k \in [K-2]$ , and the remaining  $p_{K-1}, p_K \geq 2\delta_k$  so that  $p$  is a vector of probability (i.e.  $\sum_k p_k = 1$ ). This gives

$$\inf_Q \inf_{\hat{F}} \sup_{p \in \mathcal{P}} \mathbb{E} \left[ (\hat{F} - F_\gamma(p))^2 \right] \geq \frac{C^2}{32} \left( \frac{2^{\gamma-2} [(K/2) - 1]}{(4\sqrt{\tilde{K}n}(e^{2\alpha} - e^{-2\alpha}))^\gamma} \right)^2 \geq \frac{C^2 2^{-2\gamma}}{8192} \frac{K^{2-\gamma}}{((e^{2\alpha} - e^{-2\alpha})^2 n)^\gamma},$$

where we used  $(K/2) - 1 \geq K/4$  with  $K \geq 4$ . This corresponds to the right term of both lower bounds announced in Theorem 2.7.

2°. In the case where  $K \geq n(e^{2\alpha} - e^{-2\alpha})^2$ , we separate our analysis in two ranges of values of  $\gamma$ . If  $\gamma \in (0, 1)$ , we take  $\tilde{K} = K$ , and  $\delta_k = (2K)^{-1}$  and  $p_k = 2\delta_k$  for all  $k \in [K]$ . This leads to

$$\inf_Q \inf_{\hat{F}} \sup_{p \in \mathcal{P}} \mathbb{E} \left[ (\hat{F} - F_\gamma(p))^2 \right] \geq \frac{C^2}{32} \left( \frac{2^{\gamma-2} (K/2)}{(2K)^\gamma} \right)^2 \geq \frac{C^2}{2048} K^{2(1-\gamma)},$$

which matches the first term of the lower bound for  $\gamma \in (0, 1)$  in the theorem.

If  $\gamma \in (1, 2)$ , let  $\tilde{K}$  be the smallest even integer satisfying  $\tilde{K} \geq n(e^{2\alpha} - e^{-2\alpha})^2$  and  $\tilde{K} \geq 4$ . We set  $\delta_k = (8\sqrt{\tilde{K}n}(e^{2\alpha} - e^{-2\alpha}))^{-1}$  for  $k \in [\tilde{K}]$ . We choose  $p_k = 2\delta_k$  for  $k \in [\tilde{K}-2]$ , and  $p_k \geq 2\delta_k$  for  $k \geq \tilde{K}-1$  such that  $p$  is a vector of probability. Then

$$\begin{aligned} \inf_Q \inf_{\hat{F}} \sup_{p \in \mathcal{P}} \mathbb{E} \left[ (\hat{F} - F_\gamma(p))^2 \right] &\geq \frac{C^2}{32} \left( \frac{2^{\gamma-2} [(\tilde{K}/2) - 1]}{(8\sqrt{\tilde{K}n}(e^{2\alpha} - e^{-2\alpha}))^\gamma} \right)^2 \\ &\geq \frac{C^2 4^{-2\gamma}}{8192} \frac{\tilde{K}^{2-\gamma}}{((e^{2\alpha} - e^{-2\alpha})^2 n)^\gamma} \\ &\geq \frac{C^2 4^{-2\gamma}}{8192} ((e^{2\alpha} - e^{-2\alpha})^2 n)^{2(1-\gamma)}, \end{aligned}$$

which corresponds to the first term of the lower bound for  $\gamma \in (1, 2)$  in the theorem.

The proof of Theorem 2.7 is complete.  $\square$

**Proof of Lemma D.1.** We have

$$F_\gamma(p^{(\nu)}) - F_\gamma(p) = \sum_{k=1}^{\tilde{K}/2} \left[ (p_{2k} + \nu_k \delta_{2k})^\gamma + (p_{2k} - \nu_k \delta_{2k})^\gamma - 2p_{2k}^\gamma \right] \quad (45)$$

Denoting  $f(x) = x^\gamma$  and using Taylor's formula, we have for any real  $Y > 0$ ,

$$f(Y) = f(p_{2k}) + f'(p_{2k})(Y - p_{2k}) + f''(w_Y) \frac{(Y - p_{2k})^2}{2}$$

where  $w_Y$  lies between  $Y$  and  $p_{2k}$ . We take  $Y = p_{2k} + \nu_k \delta_{2k}$  and  $\tilde{Y} = p_{2k} - \nu_k \delta_{2k}$  to get

$$\begin{aligned} f(Y) + f(\tilde{Y}) - 2p_{2k}^\gamma &= f''(w_Y) \frac{(Y - p_{2k})^2}{2} + f''(w_{\tilde{Y}}) \frac{(Y - p_{2k})^2}{2} \\ &= \gamma(\gamma - 1) (w_Y^{\gamma-2} + w_{\tilde{Y}}^{\gamma-2}) \frac{\delta_{2k}^2}{2} \end{aligned} \quad (46)$$

Since  $w_Y \vee w_{\tilde{Y}} \leq p_{2k} + \delta_{2k}$  with  $0 \leq \delta_{2k} \leq p_{2k}/2$ , and  $\gamma \in (0, 2)$ , we have

$$w_Y^{\gamma-2} \wedge w_{\tilde{Y}}^{\gamma-2} \geq (p_{2k} + \delta_{2k})^{\gamma-2} \geq (2p_{2k})^{\gamma-2}.$$

Hence, for  $\gamma \in (1, 2)$ ,

$$f(Y) + f(\tilde{Y}) - 2p_{2k}^\gamma \geq \gamma(\gamma - 1) (2p_{2k})^{\gamma-2} \delta_{2k}^2$$

which leads to the desired lower bound of (45). For  $\gamma \in (0, 1)$ , we deduce from (46) that all terms of the sum (45) are non-positive and satisfy

$$f(Y) + f(\tilde{Y}) - 2p_{2k}^\gamma \leq \gamma(\gamma - 1) (2p_{2k})^{\gamma-2} \delta_{2k}^2.$$

So, the absolute value of the sum (45) can be lower bounded as announced in the lemma.  $\square$

## References

- [1] Butucea, C. and Issartel, Y. (2021) Locally differentially private estimation of nonlinear functionals of discrete distributions. *NeurIPS*, 34.
- [2] Butucea, C. and Rohde, A. and Steinberger, L. (2020) Interactive versus non-interactive locally, differentially private estimation: Two elbows for the quadratic functional. *arXiv:2003.04773*
- [3] Duchi, J. C., Jordan, M. I. and Wainwright, M. J. (2018) Minimax optimal procedures for locally private estimation. *Journal of the American Statistical Association*, **113**(521):182–201.
- [4] Jiao, J., Venkat, K., Han, Y. and Weissman, T. (2017) Maximum Likelihood Estimation of Functionals of Discrete Distributions. *Institute of Electrical and Electronics Engineers (IEEE)*, **63**(10):6774--6798.
- [5] Joag-Dev, K., Proschan, F. (1983) Negative association of random variables with applications. *The Annals of Statistics*, vol 11, no. 1. pages 286-295.
- [6] Rohde, A. and Steinberger, L. (2020) Geometrizing rates of convergence under local differential privacy constraints, *Annals of Statistics*, **48**(5):2646–2670.
- [7] Tsybakov, A. B. (2009) *Introduction to Nonparametric Estimation*, Springer series in statistics.
- [8] Wainwright, M. J. (2019) *High-dimensional statistics*, Cambridge Series in Statistical and Probabilistic Mathematics, **48**, Cambridge University Press, Cambridge
